# Supplementary material for: The impact of physician migration on mortality in low and middle-income countries: an economic modelling study
Source: PubMed Central journal article supplement — BMJ Glob Health. 2020 Jan 7;5(1):e001535. doi: 10.1136/bmjgh-2019-001535 (PMC7042584; doi:10.1136/bmjgh-2019-001535), 2020-01-07
Supplement: bmjgh-2019-001535supp001.pdf [file bmjgh-2019-001535supp001.pdf]

**Appendix table 1.** The value of a statistical life with population-weighted means by World Health Organization region and World Bank income group.

|                                | Value of a Statistical Life (VSL) |
|--------------------------------|-----------------------------------|
| <b>WHO Region</b>              |                                   |
| Africa                         | 204,998                           |
| Americas                       | 1,131,663                         |
| Eastern Mediterranean          | 548,558                           |
| Europe                         | 1,579,237                         |
| Southeast Asia                 | 359,335                           |
| Western Pacific                | 991,653                           |
| <b>World Bank income group</b> |                                   |
| Low income                     | 41,756                            |
| Lower middle income            | 324,325                           |
| Upper middle income            | 1,223,582                         |

**Appendix table 2a.** Results of multivariable regression between mortality rates and determinants of population health, using multiple imputation for missing data. The results of this regression was used as inputs to the model.

|                                                                   | MMR           |              |        | U5MR          |              |        |
|-------------------------------------------------------------------|---------------|--------------|--------|---------------|--------------|--------|
|                                                                   | B             | CI           | p      | B             | CI           | p      |
| Intercept                                                         | 7.640         | 5.26 – 10.02 | <0.001 | 6.810         | 5.06 – 8.56  | <0.001 |
| GNI per capita, PPP                                               | -0.300        | -0.52 – 0.08 | 0.008  | -0.279        | -0.44 – 0.12 | <0.001 |
| Female adult literacy rate                                        | -0.271        | -0.67 – 0.13 | 0.178  | -0.359        | -0.66 – 0.06 | 0.020  |
| Income poverty (% of population living on less than \$1.90 a day) | 0.272         | 0.20 – 0.35  | <0.001 | 0.205         | 0.15 – 0.26  | <0.001 |
| Physician density                                                 | -0.312        | -0.46 – 0.16 | <0.001 | -0.113        | -0.22 – 0.01 | 0.036  |
| Nurse density                                                     | -0.011        | -0.15 – 0.13 | 0.880  | 0.030         | -0.07 – 0.13 | 0.568  |
| Observations                                                      | 211           |              |        | 211           |              |        |
| R <sup>2</sup> / adj. R <sup>2</sup>                              | 0.854 / 0.850 |              |        | 0.824 / 0.819 |              |        |

**Appendix table 2b.** Results of multivariable regression between mortality rates and determinants of population health, using list-wise deletion for missing data. Presented for comparison.

|                                                                   | MMR   |              |       | U5MR  |              |       |
|-------------------------------------------------------------------|-------|--------------|-------|-------|--------------|-------|
|                                                                   | B     | CI           | p     | B     | CI           | p     |
| Intercept                                                         | 6.40  | 4.10 – 8.69  | <.001 | 6.64  | 4.89 – 8.40  | <.001 |
| GNI per capita, PPP                                               | -0.10 | -0.31 – 0.12 | .366  | -0.17 | -0.33 – 0.01 | .040  |
| Female adult literacy rate                                        | -0.37 | -0.75 – 0.01 | .057  | -0.52 | -0.82 – 0.23 | <.001 |
| Income poverty (% of population living on less than \$1.90 a day) | 0.27  | 0.20 – 0.35  | <.001 | 0.19  | 0.13 – 0.25  | <.001 |

|                                      |      |               |       |       |             |      |
|--------------------------------------|------|---------------|-------|-------|-------------|------|
| Physician density                    | -    | -0.46 – -0.19 | <.001 | -0.14 | -0.24 – -   | .012 |
|                                      | 0.33 |               |       |       | 0.03        |      |
| Nurse density                        | -    | -0.15 – -0.12 | .826  | 0.10  | 0.00 – 0.21 | .045 |
|                                      | 0.01 |               |       |       |             |      |
| Observations                         |      | 103           |       |       | 104         |      |
| R <sup>2</sup> / adj. R <sup>2</sup> |      | .839 / .831   |       |       | .792 / .781 |      |

\*GNI = Gross National Income, PPP = Purchasing power parity, MMR = maternal mortality ratio, U5MR = Under 5 mortality ratio

**Appendix table 3.** Average lives saved per physician per year as predicted by the model, by World Health Organization region and World Bank income group.

|                                         | <b>Maternal deaths avoidable<br/>per physician</b> | <b>Under 5 deaths avoidable per<br/>physician</b> |
|-----------------------------------------|----------------------------------------------------|---------------------------------------------------|
| <b>World Health Organization region</b> |                                                    |                                                   |
| Africa                                  | 0.272 (0.113 - 0.619)                              | 1.449 (0.185 - 3.698)                             |
| Americas                                | 0.005 (0.002 - 0.012)                              | 0.045 (0.006 - 0.112)                             |
| Eastern Mediterranean                   | 0.016 (0.006 - 0.038)                              | 0.206 (0.027 - 0.517)                             |
| Europe                                  | 0 (0 - 0.001)                                      | 0.005 (0.001 - 0.014)                             |
| Southeast Asia                          | 0.016 (0.008 - 0.035)                              | 0.152 (0.019 - 0.376)                             |
| Western Pacific                         | 0.006 (0.002 - 0.014)                              | 0.054 (0.007 - 0.139)                             |
| <b>World Bank income group</b>          |                                                    |                                                   |
| Low income                              | 0.722 (0.298 - 1.62)                               | 3.877 (0.497 - 9.848)                             |
| Lower middle income                     | 0.035 (0.015 - 0.081)                              | 0.261 (0.034 - 0.656)                             |
| Upper middle income                     | 0.003 (0.001 - 0.007)                              | 0.037 (0.005 - 0.097)                             |

**Appendix table 4.** The total annual cost of physician emigration, by country.

|                                       | <b>Total annual cost (million USD)</b> | <b>% of Gross National Income</b> |
|---------------------------------------|----------------------------------------|-----------------------------------|
| <b>Africa</b>                         | 6,425 (1,572 - 15,414)                 | 0.370% (0.0906% - 0.888%)         |
| Algeria                               | 272 (63 - 625)                         | 0.141% (0.033% - 0.325%)          |
| Angola                                | 276 (48 - 776)                         | 0.264% (0.046% - 0.742%)          |
| Benin                                 | 44 (9 - 105)                           | 0.484% (0.102% - 1.147%)          |
| Botswana                              | 0 (0 - 0)                              | 0% (0% - 0%)                      |
| Burkina Faso                          | 17 (4 - 43)                            | 0.144% (0.032% - 0.369%)          |
| Burundi                               | 16 (4 - 40)                            | 0.562% (0.153% - 1.405%)          |
| Cabo Verde                            | 0 (0 - 0)                              | 0% (0% - 0%)                      |
| Cameroon                              | 186 (46 - 496)                         | 0.607% (0.148% - 1.613%)          |
| Central African Republic              | 2 (1 - 5)                              | 0.125% (0.031% - 0.326%)          |
| Chad                                  | 0 (0 - 0)                              | 0% (0% - 0%)                      |
| Comoros                               | 0 (0 - 0)                              | 0% (0% - 0%)                      |
| Congo                                 | 168 (49 - 376)                         | 1.434% (0.419% - 3.211%)          |
| Congo, the Democratic Republic of the | 12 (3 - 31)                            | 0.038% (0.01% - 0.097%)           |
| Cote d'Ivoire                         | 34 (9 - 81)                            | 0.105% (0.027% - 0.253%)          |
| Equatorial Guinea                     | 0 (0 - 0)                              | 0% (0% - 0%)                      |
| Eritrea                               | 0 (0 - 0)                              | 0% (0% - 0%)                      |
| Ethiopia                              | 302 (74 - 710)                         | 0.513% (0.125% - 1.206%)          |
| Gabon                                 | 71 (16 - 174)                          | 0.445% (0.098% - 1.093%)          |
| Gambia                                | 0 (0 - 0)                              | 0% (0% - 0%)                      |
| Ghana                                 | 415 (95 - 934)                         | 1.025% (0.235% - 2.308%)          |
| Guinea                                | 15 (4 - 36)                            | 0.253% (0.068% - 0.606%)          |
| Guinea-Bissau                         | 0 (0 - 0)                              | 0% (0% - 0%)                      |
| Kenya                                 | 42 (13 - 100)                          | 0.068% (0.02% - 0.161%)           |
| Lesotho                               | 0 (0 - 0)                              | 0% (0% - 0%)                      |
| Liberia                               | 15 (5 - 31)                            | 0.894% (0.271% - 1.796%)          |
| Madagascar                            | 15 (4 - 39)                            | 0.152% (0.037% - 0.384%)          |
| Malawi                                | 14 (4 - 34)                            | 0.246% (0.072% - 0.577%)          |
| Mali                                  | 23 (5 - 66)                            | 0.176% (0.039% - 0.496%)          |
| Mauritania                            | 0 (0 - 1)                              | 0.009% (0.002% - 0.026%)          |
| Mauritius                             | 1 (0 - 3)                              | 0.005% (0.001% - 0.028%)          |

|                                 |                            |                                  |
|---------------------------------|----------------------------|----------------------------------|
| Mozambique                      | 6 (1 - 14)                 | 0.035% (0.009% - 0.086%)         |
| Namibia                         | 0 (0 - 0)                  | 0% (0% - 0%)                     |
| Niger                           | 12 (3 - 28)                | 0.147% (0.035% - 0.361%)         |
| Nigeria                         | 3,128 (830 - 7,457)        | 0.616% (0.164% - 1.468%)         |
| Rwanda                          | 2 (1 - 6)                  | 0.03% (0.008% - 0.074%)          |
| Sao Tome and Principe           | 0 (0 - 0)                  | 0% (0% - 0%)                     |
| Senegal                         | 74 (18 - 170)              | 0.495% (0.123% - 1.145%)         |
| Sierra Leone                    | 35 (11 - 79)               | 0.885% (0.284% - 1.958%)         |
| South Africa                    | 955 (187 - 2,308)          | 0.286% (0.056% - 0.691%)         |
| Swaziland                       | 1 (0 - 2)                  | 0.02% (0.005% - 0.048%)          |
| Tanzania, United Republic of    | 71 (19 - 174)              | 0.149% (0.04% - 0.366%)          |
| Togo                            | 22 (5 - 50)                | 0.561% (0.122% - 1.269%)         |
| Uganda                          | 50 (12 - 122)              | 0.183% (0.045% - 0.446%)         |
| Zambia                          | 39 (8 - 98)                | 0.162% (0.033% - 0.405%)         |
| Zimbabwe                        | 89 (22 - 198)              | 0.658% (0.165% - 1.471%)         |
| <b>Americas</b>                 | <b>1,079 (216 - 2,631)</b> | <b>0.020% (0.0041% - 0.050%)</b> |
| Argentina                       | 40 (8 - 98)                | 0.007% (0.002% - 0.018%)         |
| Belize                          | 2 (0 - 13)                 | 0.138% (0.012% - 0.817%)         |
| Bolivia, Plurinational State of | 54 (13 - 125)              | 0.167% (0.041% - 0.388%)         |
| Brazil                          | 45 (8 - 111)               | 0.002% (0% - 0.005%)             |
| Colombia                        | 84 (18 - 223)              | 0.024% (0.005% - 0.065%)         |
| Costa Rica                      | 11 (2 - 29)                | 0.022% (0.004% - 0.057%)         |
| Cuba                            | 6 (1 - 16)                 | 0.008% (0.002% - 0.021%)         |
| Dominican Republic              | 296 (56 - 680)             | 0.451% (0.085% - 1.035%)         |
| Ecuador                         | 64 (11 - 171)              | 0.066% (0.011% - 0.176%)         |
| El Salvador                     | 3 (1 - 8)                  | 0.012% (0.002% - 0.031%)         |
| Guatemala                       | 24 (5 - 70)                | 0.042% (0.008% - 0.119%)         |
| Guyana                          | 8 (2 - 21)                 | 0.258% (0.049% - 0.681%)         |
| Haiti                           | 36 (8 - 81)                | 0.411% (0.097% - 0.933%)         |
| Honduras                        | 5 (1 - 13)                 | 0.029% (0.007% - 0.069%)         |
| Jamaica                         | 29 (6 - 70)                | 0.213% (0.042% - 0.508%)         |
| Mexico                          | 240 (44 - 572)             | 0.019% (0.004% - 0.046%)         |
| Nicaragua                       | 4 (1 - 10)                 | 0.036% (0.008% - 0.088%)         |
| Panama                          | 13 (3 - 34)                | 0.029% (0.007% - 0.072%)         |
| Paraguay                        | 6 (1 - 15)                 | 0.02% (0.005% - 0.053%)          |

|                                            |                            |                                  |
|--------------------------------------------|----------------------------|----------------------------------|
| Peru                                       | 57 (12 - 141)              | 0.03% (0.006% - 0.073%)          |
| Saint Vincent and the Grenadines           | 0 (0 - 0)                  | 0% (0% - 0%)                     |
| Suriname                                   | 0 (0 - 2)                  | 0.006% (0.002% - 0.03%)          |
| Venezuela, Bolivarian Republic of          | 50 (13 - 129)              | 0.014% (0.004% - 0.036%)         |
| <b>Eastern Mediterranean</b>               | <b>3,468 (610 - 8,490)</b> | <b>0.205% (0.0361% - 0.503%)</b> |
| Afghanistan                                | 27 (6 - 68)                | 0.135% (0.029% - 0.342%)         |
| Egypt                                      | 196 (31 - 505)             | 0.064% (0.01% - 0.165%)          |
| Iran, Islamic Republic of                  | 309 (49 - 780)             | 0.06% (0.01% - 0.152%)           |
| Iraq                                       | 847 (137 - 2,053)          | 0.4% (0.065% - 0.969%)           |
| Jordan                                     | 46 (9 - 113)               | 0.13% (0.024% - 0.318%)          |
| Lebanon                                    | 18 (2 - 50)                | 0.04% (0.005% - 0.112%)          |
| Libya                                      | 20 (3 - 51)                | 0.07% (0.01% - 0.173%)           |
| Morocco                                    | 57 (12 - 144)              | 0.054% (0.011% - 0.136%)         |
| Pakistan                                   | 1,608 (283 - 3,906)        | 0.592% (0.104% - 1.438%)         |
| Sudan                                      | 295 (66 - 707)             | 0.381% (0.085% - 0.915%)         |
| Tunisia                                    | 16 (3 - 42)                | 0.037% (0.007% - 0.094%)         |
| Yemen                                      | 30 (9 - 72)                | 0.098% (0.029% - 0.234%)         |
| <b>Europe</b>                              | <b>434 (75 - 1,070)</b>    | <b>0.013% (0.0022% - 0.031%)</b> |
| Albania                                    | 6 (1 - 16)                 | 0.046% (0.005% - 0.133%)         |
| Armenia                                    | 1 (0 - 2)                  | 0.006% (0.001% - 0.019%)         |
| Azerbaijan                                 | 10 (1 - 30)                | 0.016% (0.002% - 0.048%)         |
| Belarus                                    | 2 (0 - 4)                  | 0.003% (0% - 0.007%)             |
| Bosnia and Herzegovina                     | 1 (0 - 3)                  | 0.003% (0% - 0.019%)             |
| Bulgaria                                   | 17 (2 - 42)                | 0.031% (0.004% - 0.079%)         |
| Georgia                                    | 1 (0 - 3)                  | 0.007% (0.001% - 0.019%)         |
| Kazakhstan                                 | 5 (1 - 13)                 | 0.003% (0% - 0.006%)             |
| Kyrgyzstan                                 | 0 (0 - 1)                  | 0.004% (0.001% - 0.01%)          |
| Macedonia, the former Yugoslav Republic of | 2 (0 - 12)                 | 0.02% (0.001% - 0.116%)          |
| Moldova, Republic of                       | 1 (0 - 2)                  | 0.008% (0.001% - 0.022%)         |
| Montenegro                                 | 0 (0 - 1)                  | 0.003% (0% - 0.021%)             |
| Romania                                    | 120 (23 - 275)             | 0.063% (0.012% - 0.146%)         |
| Russian Federation                         | 183 (32 - 448)             | 0.011% (0.002% - 0.026%)         |
| Serbia                                     | 7 (1 - 17)                 | 0.017% (0.003% - 0.043%)         |

|                                     |                                |                                  |
|-------------------------------------|--------------------------------|----------------------------------|
| Tajikistan                          | 1 (0 - 2)                      | 0.007% (0.001% - 0.02%)          |
| Turkey                              | 73 (12 - 180)                  | 0.009% (0.001% - 0.023%)         |
| Turkmenistan                        | 1 (0 - 2)                      | 0.001% (0% - 0.004%)             |
| Ukraine                             | 4 (1 - 10)                     | 0.004% (0.001% - 0.009%)         |
| Uzbekistan                          | 2 (0 - 6)                      | 0.003% (0% - 0.009%)             |
| <b>Southeast Asia</b>               | <b>3,804 (780 - 9,042)</b>     | <b>0.102% (0.0209% - 0.243%)</b> |
| Bangladesh                          | 82 (18 - 196)                  | 0.043% (0.009% - 0.103%)         |
| Bhutan                              | 0 (0 - 0)                      | 0% (0% - 0%)                     |
| India                               | 3,427 (701 - 8,126)            | 0.164% (0.034% - 0.389%)         |
| Indonesia                           | 90 (20 - 218)                  | 0.01% (0.002% - 0.025%)          |
| Maldives                            | 0 (0 - 0)                      | 0.002% (0% - 0.013%)             |
| Myanmar                             | 61 (13 - 153)                  | 0.098% (0.02% - 0.245%)          |
| Nepal                               | 36 (9 - 82)                    | 0.171% (0.045% - 0.392%)         |
| Sri Lanka                           | 63 (12 - 144)                  | 0.079% (0.015% - 0.18%)          |
| Thailand                            | 45 (7 - 123)                   | 0.012% (0.002% - 0.032%)         |
| Timor-Leste                         | 0 (0 - 0)                      | 0% (0% - 0%)                     |
| Western Pacific                     | 645 (132 - 1,598)              | 0.005% (0.0011% - 0.014%)        |
| Cambodia                            | 4 (1 - 9)                      | 0.021% (0.005% - 0.055%)         |
| China                               | 84 (15 - 210)                  | 0.001% (0% - 0.002%)             |
| Fiji                                | 1 (0 - 5)                      | 0.022% (0.003% - 0.126%)         |
| Kiribati                            | 0 (0 - 0)                      | 0% (0% - 0%)                     |
| Lao People's Democratic<br>Republic | 2 (0 - 5)                      | 0.015% (0.003% - 0.039%)         |
| Malaysia                            | 16 (4 - 39)                    | 0.005% (0.001% - 0.012%)         |
| Micronesia, Federated States<br>of  | 0 (0 - 0)                      | 0% (0% - 0%)                     |
| Mongolia                            | 1 (0 - 3)                      | 0.009% (0.002% - 0.023%)         |
| Papua New Guinea                    | 3 (1 - 9)                      | 0.019% (0.004% - 0.053%)         |
| Philippines                         | 525 (110 - 1,296)              | 0.147% (0.031% - 0.362%)         |
| Samoa                               | 0 (0 - 2)                      | 0.038% (0.003% - 0.228%)         |
| Solomon Islands                     | 0 (0 - 0)                      | 0% (0% - 0%)                     |
| Tonga                               | 0 (0 - 0)                      | 0% (0% - 0%)                     |
| Vanuatu                             | 0 (0 - 0)                      | 0% (0% - 0%)                     |
| Viet Nam                            | 9 (2 - 21)                     | 0.005% (0.001% - 0.012%)         |
| <b>Total</b>                        | <b>15,855 (3,384 - 38,245)</b> | <b>0.057% (0.0123% - 0.138%)</b> |
